# Supplementary material
Source: MDPI journal article supplement (https://www.mdpi.com/2079-6412/9/8/509)

# Supplementary Materials: Tribological and Thermophysical Properties of Environmentally-Friendly Lubricants Based on Trimethylolpropane Trioleate with Hexagonal Boron Nitride Nanoparticles as Additive

José M. Liñeira del Río <sup>1</sup>, María J. G. Guimarey <sup>1</sup>, María J. P. Comuñas <sup>1</sup>, Enriqueta R. López <sup>1,\*</sup>, Jose I. Prado <sup>2</sup>, Luis Lugo <sup>2</sup> and Josefa Fernández <sup>1</sup>

<sup>1</sup> Laboratory of Thermophysical Properties, NaFoMat Group, Department of Applied Physics, Faculty of Physics, University of Santiago de Compostela, E-15782 Santiago de Compostela, Spain

<sup>2</sup> Departamento de Física Aplicada, Facultade de Ciencias, Universidade de Vigo, E-36310 Vigo, Spain

\* Correspondence: enriqueta.lopez@usc.es

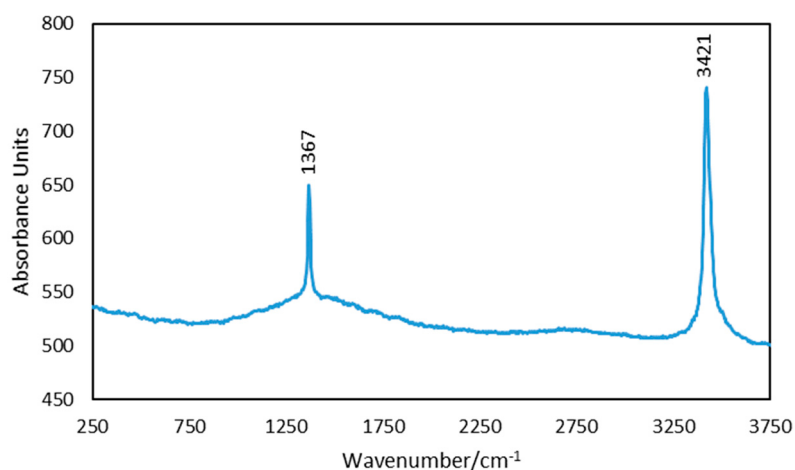

Figure S1. Raman spectrum of h-BN nanoparticles.

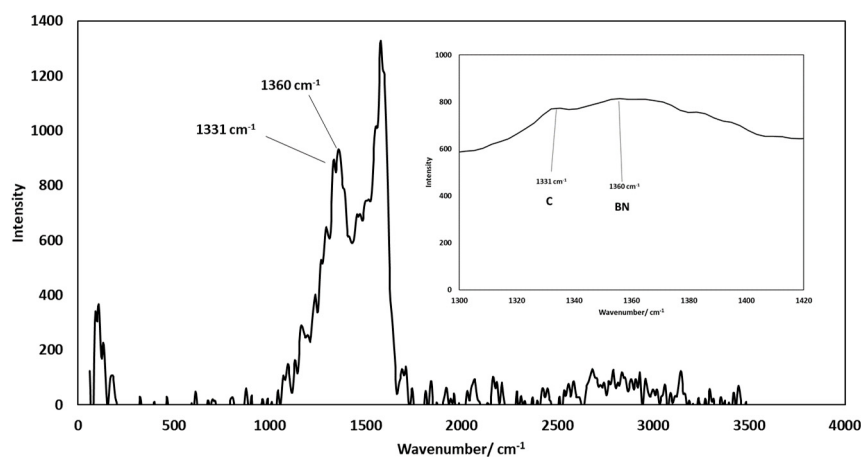

Figure S2. Deconvolution of the Raman spectrum corresponding to the red areas of the mapping (Figure 11d) for the 0.75 wt.% h-BN nanolubricant. Inset: Detail of the overlapping peaks.

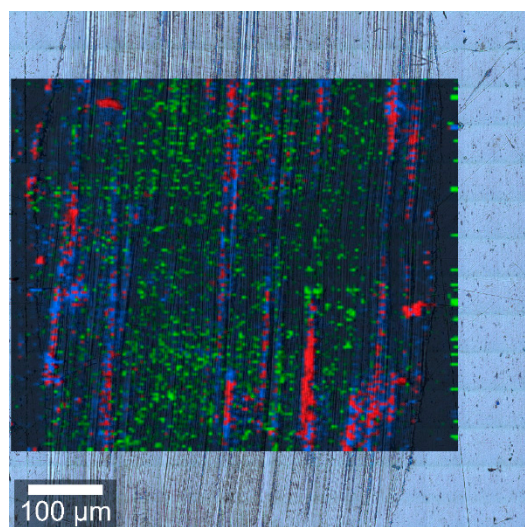

**Figure S3.** Optical image of the worn surface tested with the 0.75 wt.% h-BN nanolubricant combined the with its Raman spectra mapping (Figure 10).

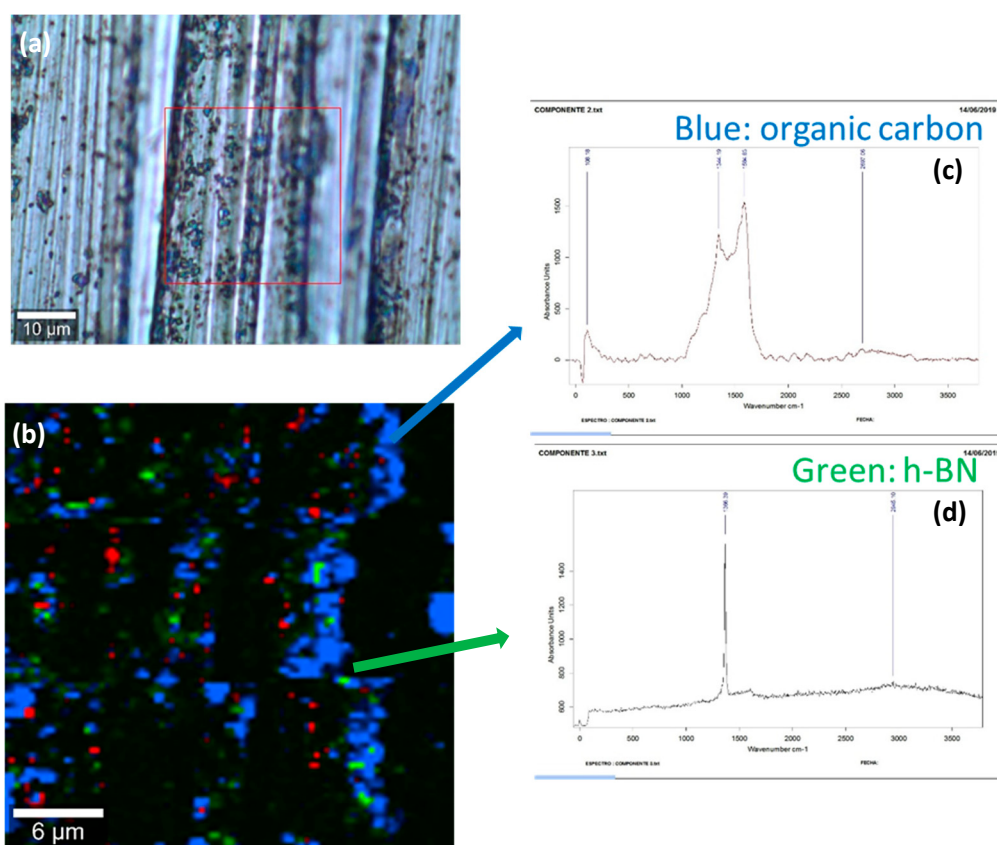

**Figure S4.** Raman spectra corresponding to the worn surface obtained with the 1 wt.% h-BN nanolubricant. (a) Micrograph of the worn surface; (b) Mapping of the components in the worn surface; (c) Spectrum of the blue area; (d) Spectrum of the green area.

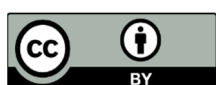

Supplement: s1 [file s1]
